# Supplementary material for: SPP1+ tumor-associated macrophages define a high-risk subgroup and inform personalized therapy in hepatocellular carcinoma
Source: Front Oncol. 2025 Jul 1;15:1606195. doi: 10.3389/fonc.2025.1606195 (PMC12259448; doi:10.3389/fonc.2025.1606195)
Supplement: Supplementary file 5 [file Table5.xlsx]

## Sheet: Sheet1
Table S5. Characteristic genes of cluster-related modules.
turquoise module_C3	red module_C1	brown module_C2
SLC10A1	ABCB1	HN1
GLYATL1	ABCC2	EHHADH
CYP8B1	ABCG2	ABAT
TAT	ABHD6	PAFAH1B3
ACSM2A	AC007163.2	DMGDH
GLYAT	ACE2	GYS2
ABCB4	ACSL5	CAT
PCK2	ACSL6	SNRPD2
HAO1	ACSS3	NOP56
UBE2S	ACTN2	ALDH6A1
RTP3	ADCK3	CLIC1
SLC27A5	ADH6	SCP2
MFSD10	ADRB2	SNRPB
HSD17B6	ADRBK2	FBL
CYB5A	AGFG2	MPDZ
HMGA1	AGPAT2	TOMM40
ADH1B	AHR	NR1I2
PLG	AKR1C1	ABCA6
MYBL2	AKR1C2	PFKFB1
NAP1L1	ALAD	PRMT1
CYP4F2	ALAS1	PPP1R14B
DTYMK	ALDH1B1	TRIM28
BDH1	ALDH3A1	SLC52A2
PTTG1	ALDH3A2	SNRPF
AURKB	AMACR	F11
ALDH2	ANKFN1	RPS2
LPCAT1	ANKRD29	TMEM147
H2AFX	ANKRD37	FMO4
SEC14L2	AOX1	ZNF581
KIF2C	AQP11	PSMG3
G6PD	AQP6	SLCO1B1
ALDOA	AQP9	ARL2
SAPCD2	AR	PGRMC1
CES2	ARL4A	CPN2
CDC20	ARSA	CKLF
CENPM	ARSF	F13B
GTF3C6	ASL	C19orf48
KCTD17	ASPG	MYO1B
CDO1	ASPSCR1	DPM2
ACSM2B	ATP2B2	DHTKD1
ACSM5	ATP6V0E2	SSR2
MARCKSL1	AVIL	RPL35A
DDX39A	AXIN2	RPLP2
SPHK1	BAIAP2L1	SLC6A1
UBE2C	BAMBI	RPSA
G6PC3	BCL2L1	RPS19
BIRC5	BCL6	ABCB11
P2RX4	BIK	PDK4
ALYREF	BLNK	SEC61G
SLC27A2	BMP1	BAX
BAAT	BMP4	RPL27A
CDCA3	C17orf96	DAO
RBP4	C1orf53	RPL36A
TTC36	C1orf64	ZNF580
TYRO3	C1QTNF3	NUDT1
CEP55	C9orf152	NT5C
LDHD	CACNG4	RPL18
STIP1	CADM1	YDJC
C8A	CAMK1D	RPS8
TACC3	CAP2	RPS3
MAT1A	CBLC	RANGRF
SLC22A1	CBLN4	KLF9
TRAF2	CCDC170	SLC25A15
CYP4A22	CD36	NME1
SYNGR2	CDA	CCT3
CCNB1	CDC14B	SAR1B
UGT2B10	CDK6	CYP2A6
OTC	CH25H	CPED1
HSD11B1	CHADL	GADD45A
PRR11	CHN2	RPS5
DEPDC1B	CHRDL2	SNRPE
RECQL4	CHST15	C9orf142
CENPA	CLDN2	LSM2
RBCK1	CLDN3	CD320
CYP2C9	CNNM1	RFXANK
CKS2	CNTD2	COL18A1
BAK1	CNTNAP2	SCNM1
C12orf49	COBLL1	LONP2
LMNB2	COL7A1	IYD
IVD	CPLX2	ITPA
DPYS	CPPED1	GPLD1
YWHAZ	CPQ	SSNA1
CFHR4	CRLS1	RPLP0
MPZL1	CRP	TPRN
CENPW	CRTAP	MARC2
C6	CRYZ	SORBS2
CA9	CST1	RPS11
HDAC11	CSTA	RPS16
NCAPH2	CTNNA2	SAC3D1
UCK2	CTNNBL1	MYL6B
SPC25	CUX2	RPL28
PLK1	CYFIP2	CYP2C8
IFNGR2	CYP1A1	SLC16A2
RCC2	CYP1A2	LSM7
TROAP	CYP2E1	SEPP1
BTNL9	CYP3A4	RPL8
ADH4	CYP3A7	RPL37
TMED3	CYP4F22	ACADL
C10orf35	DCPS	RPL27
CDT1	DISP1	ETNPPL
A1BG	DKK4	MZT2A
FAM110A	DNAJC12	RPL38
GAL3ST1	DNAJC4	RPS21
GRHPR	DPP4	RPS9
ADHFE1	DSG1	TMEM56
CDCA4	DUSP16	NR2C2AP
TRIP13	DUT	C16orf45
WDR34	DYNC1I1	TLCD1
UBE2T	ECM2	RPS7
CDK16	EMP2	RPS27A
ARHGEF2	ENC1	PRR7
SOX4	ENHO	ETFDH
CYP4A11	ENTPD8	RPL23A
UQCRH	EPB41L4B	RPL24
COL9A2	EPHA1	HRAS
KIAA0101	EPHB2	RPL35
GTSE1	ERICH5	EPS8L3
ASPDH	F11R	RPL13A
SAMD1	FAAH2	BCL2L12
RASSF7	FAM110C	LSM4
MOGAT2	FAM171A1	AASS
SERPINA10	FAM3B	ACSL1
SKA1	FAM43A	SRD5A1
TLDC2	FAM69B	NMB
NRM	FAM8A1	RPL7A
ACAT1	FBLN7	EFNA3
AFM	FBXO31	GNE
CKAP4	FERMT1	UQCC3
F9	FES	RPL5
LZTS2	FGF2	CCDC167
PCK1	FGFRL1	RPS24
CDCA5	FIGF	RPL9
INSIG1	FLVCR2	SRM
COLCA2	FMO3	GNB2L1
PHF19	FOXRED2	UGP2
C11orf84	FRMD3	MYEOV2
CDCA7	FURIN	KAT2B
HILPDA	GCH1	RPL37A
GNAZ	GCLC	PHPT1
SKA3	GDA	ZNF692
LRRC1	GGH	SMIM14
DUSP9	GLDC	G6PC
H2AFZ	GLT1D1	MYLK
HAGH	GLUD1	RPL23
CDC45	GLUL	GATM
ACKR2	GMPR	SRD5A2
CEP131	GNAI1	RPL18A
KPNA2	GNB5	CYP4V2
AADAC	GNG4	RPS10
ST3GAL6	GOT1	RPL32
SPATC1L	GPAM	NAT14
PITX1	GPHN	RPLP1
TRNP1	GREB1	PCSK6
RDH16	GRPR	TBCB
AGTRAP	GSTM4	SF3B5
CTH	HABP2	RPS12
TM6SF2	HABP4	ZNF579
RGN	HAL	SLC46A3
EFNA4	HAUS4	GHR
MEX3A	HEPACAM	PGP
RANGAP1	HHIPL2	ENTPD5
CACYBP	HIBADH	SLCO2B1
IL27	HIST1H2AG	ACOX1
CHAF1B	HIST1H2BJ	WDYHV1
PSRC1	HLF	RPS6
HJURP	HMGB3	SLC38A4
PYGO2	HPGD	PIK3R1
PYCR1	HRASLS2	HSF1
DEPDC7	HS3ST3B1	FKBP11
NDRG3	HS3ST4	IMPDH2
PPT1	HS6ST1	SLC28A1
SERPING1	HSD17B4	MAF1
RHNO1	HSDL2	MUT
TCF3	HTR1D	PINK1
SAE1	HTR2B	MRPS12
NT5DC2	ICK	ACADM
CCNB2	ID2	CSNK2B
MDK	IER2	UBALD2
GAPDH	IFNGR1	FNDC5
SF3A2	IGSF8	RPL39
APOA5	IL17D	RPS3A
HMGN1	IMPAD1	SSBP4
P3H4	INHBE	CGNL1
ACOT12	INSIG2	NUGGC
RFC4	IQGAP2	HSD17B13
GNPDA1	IRS1	CTSO
F12	IRS2	ABCC9
EZH2	ITGA6	RPS15
GFRA1	ITPR2	SURF2
CDK1	KCNK1	RPL7
FAM109A	KCNU1	PPP1R35
CDC6	KLHDC9	SCAMP3
DCTPP1	KLK4	MZT2B
KLKB1	KMO	RPL36
BZW2	LACTB2	TMEM141
HGD	LAMA3	XDH
EGLN3	LEF1	TRAPPC1
MAPK13	LGALS4	ACADSB
ANKS6	LGR5	ACAA2
NRSN2	LIN7A	UBA52
KIFC1	LMOD1	RPL17
AFP	LPCAT2	C8orf59
POLD1	LRP1	ARL16
HPD	LRRC45	PDE9A
UNC119	LSR	PPAP2B
NUF2	LURAP1L	MT-ND5
SOX12	LYPLAL1	RPS4X
MMD	MAL2	DPCD
GCDH	MAOA	SLC41A2
ACBD4	MAOB	CFL2
RIBC2	MAP3K8	SHMT1
MAPRE1	MATN3	SH3D19
HAAO	MBNL3	INHBC
PLXNA1	MERTK	RPL14
HPR	MGLL	PCBP4
AZGP1	MIA3	COX6B1
CKS1B	MINPP1	SORL1
FLVCR1	MME	SLC25A6
NPM1	MPC1	EXOSC5
KIAA1522	MTHFD1	ABTB2
NDC80	MTMR11	ALDH8A1
NCAPG	MTSS1	RPS15A
NEURL3	MYH7B	MTHFS
ECHDC2	MYOM1	CRY2
ANXA10	MYRIP	ROMO1
ASF1B	NADK2	RPS14
ETV4	NAGS	ADRA1B
TTLL4	NEDD4	RPL31
HRG	NEK3	TRO
C16orf59	NEU4	FETUB
MKI67	NFIX	RPS27
TGIF2	NKD1	RPS20
CRYL1	NMT2	SLC35D1
FEN1	NOTUM	SERF2
PEX11G	NPR2	RPL12
DLGAP5	NR0B2	PSMB3
CD24	OAT	BCKDHB
KIF11	ODAM	RPL4
SLC39A1	ONECUT2	ABCA8
SLC38A1	PAGE4	C20orf27
KIF18B	PANX1	SOWAHB
SOX9	PANX2	SLC22A25
TPX2	PARVB	C1S
PLEKHB1	PCP4	GPD1
MCM7	PDZK1	LAMTOR4
SF3B4	PEX11A	POLR2I
EHMT2	PGC	ANO1
FAM118A	PGLYRP2	RAPGEF4
MFI2	PGM5	BOP1
CYP2B6	PHLDA1	ZBTB16
ADI1	PHYHIPL	FAXDC2
CDC25B	PIM1	SC5D
LAPTM4B	PIR	PLEKHJ1
CPS1	PLIN1	PKN1
NAT2	PNPO	RPS23
PRAME	POLB	RCAN1
FUCA2	PPAP2A	EXOSC4
PKIB	PPP1R1A	RNF125
SMAGP	PREB	APBA1
CDC42EP1	PRKAA2	ATP5E
SLC6A8	PRR5L	SLC25A25
ALDOB	PVRL2	RHOB
PAK4	PXDC1	MT-CYB
CTDSPL	PYROXD2	RPS18
TTK	RAC3	DMKN
HFE2	RASL10B	CYP2A7
ARID3A	RBM24	MFAP3L
RBM38	RBP1	C19orf53
PLP2	RDH12	S100A13
MASP2	RDH5	MT-ND4L
NDRG1	REG1A	C11orf54
KIF20A	REG1B	RPL26
CD276	REG3A	PCYOX1
ACTG1	RELN	ALDH9A1
C4BPA	RHBG	ABHD2
PON3	RHOBTB1	THRSP
GABARAPL1	RIPPLY1	EEF1B2
SMG5	RND1	RPS17
PRKCD	RNF43	MIIP
TUBB4B	RP11-35N6.1	INAFM1
KIF4A	RTN4R	RPL29
PLXNA3	RUNDC3B	RPL10A
MCM6	RXRG	SYBU
WDR54	S1PR2	ENPEP
HRSP12	SALL1	OXLD1
BAIAP2L2	SBSPON	NLRP6
MCM4	SDC4	LAGE3
QDPR	SDPR	HSPB1
PPIL1	SDS	NFIC
PLIN3	SDSL	FAM50A
ASRGL1	SEMA7A	CES4A
TUBB	SEPT4	SLC17A4
EPO	SEPT6	CD302
RNASEH2A	SGK223	ADRA1A
FANCG	SH2D4A	CMBL
TSKU	SH3BGRL2	AKR1D1
GINS1	SH3BP4	CPNE1
ADM2	SH3GL3	RPL30
ASNS	SHH	RPL13
GRAMD1A	SHISA4	GADD45GIP1
NEK2	SIAH2	TOP1MT
PON1	SLC13A3	SPSB2
SLC10A3	SLC15A1	PBLD
HPX	SLC16A1	SSR4
TRIM71	SLC16A11	RPL21
FRAS1	SLC16A12	HAO2
AKR7A3	SLC16A4	SHARPIN
CDCA8	SLC17A3	C1orf168
BLMH	SLC17A9	GBP7
SRC	SLC1A2	SETD7
UGT2B7	SLC20A2	MT-ATP8
RCL1	SLC22A11	SLC39A4
DHRS1	SLC22A12	RETSAT
CSTB	SLC22A3	NNT
NDUFA4L2	SLC22A4	LIPG
NXPH4	SLC23A2	NDUFS6
TMEM9	SLC25A13	NDUFA13
REEP4	SLC25A18	KRT10
CHMP4C	SLC25A30	FKBP4
FOXJ1	SLC27A3	PSD3
ORC1	SLC2A12	TXNDC17
H2AFY2	SLC2A4	SUCLG2
FANCI	SLC30A1	WNK3
PIGS	SLC30A2	FAM195B
KIF23	SLC35C1	COA6
OGDHL	SLC43A3	PUF60
CENPF	SLC47A1	NPM3
NCAPD2	SLC51B	AADAT
SULT1C2	SLC5A6	C12orf57
ACAA1	SLC6A12	ATP5G1
C8B	SLC6A2	GLS2
FBP1	SLC7A11	CPT2
BUB1B	SLCO1B3	AK3
FLOT2	SLPI	FOLH1
RHPN1	SMCO4	PMF1
AMDHD1	SMPX	SMIM20
BUB1	SMR3A	PCSK1N
CDKN3	SMYD2	HOMER2
FAM189B	SNAI2	CCDC23
CBX2	SORD	EEF1D
MCM5	SP5	C9orf16
RCC1	SPARCL1	EDF1
MCM3	SS18L1	C7orf50
AGXT2	SSTR1	MRPS21
EXO1	STEAP1	LEPR
ZWINT	STEAP2	ANAPC11
NUP210	STRA13	NDUFS5
RRM2	SUGCT	FGFR4
ELF3	SULT1B1	RPL41
PKMYT1	SULT4A1	CRELD2
CCT5	SYT12	TOB1
BMF	SYT17	MT-ND6
NCAPH	TBX3	SLC9B2
SLC2A1	TBX4	COA3
UGT2B15	TCEAL1	POLE4
GOT2	TCF7	C8orf33
ADH1A	TDGF1	QPCTL
ENTPD2	TGIF1	COMMD6
HADH	THSD1	FAS
CYP26B1	TJP3	TMEM74B
DNASE1L3	TLE2	RPL34
CYP4F11	TM4SF4	CBR4
ARNT2	TMCC1	GIPC1
CIB2	TMED6	MANF
ANLN	TMEM100	TIMM13
NEU1	TMEM150C	FZD4
TMEM65	TMEM245	LRRC2
ADH1C	TMEM252	SMARCA2
CDC25C	TMEM45A	MRPL13
FAM49B	TMEM64	RPS28
ANGPTL3	TNFRSF19	ACO1
CD14	TNFSF10	GPR125
MELK	TOX3	RPL10
SLC6A13	TPRG1L	CSAD
MAD2L1	TRIB2	SOCS2
IGF2BP2	TRIM15	ACBD5
ENO1	TRIM16L	MFSD2A
PROZ	TSC22D1	NDUFB9
C19orf33	TSPAN5	KRT18
STMN1	TTC9	RPL22L1
DKK1	TTPA	PPARGC1A
FGFR3	TWIST2	UQCRB
CTNND2	UBE2QL1	NME3
RUSC1	UBXN10	RPS26
CARD10	UGT1A1	NENF
RBP5	UGT1A3	OIT3
ABHD17C	UGT1A4	MRPL14
FXYD3	UST	PPARA
UHRF1	VEGFB	LPIN2
TUBG1	VNN1	HGH1
ALDH18A1	VNN3	PABPC1
C1QTNF6	VSTM4	SCX
GMNN	ZBTB18	PGM1
STX3	ZCCHC6	NSMCE2
GPT	ZFP36L2	AGL
LIMS2	ZMYND15	CFHR5
SMIM6	ZNF385B	NAA38
TMEM164	ZNF503	MT-CO1
SMIM22	ZNF703	ACSM3
DQX1		SIAE
CLSTN1		KRT8
MSI1		ISOC1
SHCBP1		SLC39A14
GPT2		RNF144B
LECT2		USMG5
SLC2A6		TCEB2
SPC24		GLTSCR2
NUDT7		BBOX1
ANG		GNAO1
FRAT2		VPS28
HDHD1		NDUFA3
SLC44A3		EIF3H
KAT2A		PROX1
DDIT3		MT-ND4
IGF2BP1		C1RL
TMEM184B		C17orf89
LIG1		FAM134B
SALL2		PFDN6
RACGAP1		ATP11C
SLC35B2		FOXO1
SLC13A5		ZFAND5
C5orf30		SLC1A1
ALDH1L1		SWI5
NELFE		CST3
TRIM31		TYSND1
CFHR2		RNF152
MCM2		FAM149A
RINL		SDF2L1
FAM127B		POLR2L
PHYHD1		TRIM35
TK1		FGGY
ELFN1		PSMD4
GSTZ1		FBXL5
TRIB3		DUSP23
FABP4		IFNLR1
ACMSD		NUDT14
MAGED1		ACACB
SHKBP1		C6orf48
NASP		RPS29
ACOT2		AUTS2
TFF2		TMEM47
LMNB1		JOSD2
PCNA		C19orf24
SIX2		PER1
TMEM220		BPIFB2
TOP2A		MRPL23
SLC26A6		SMIM4
RBM3		HIGD1A
DNM1		RABAC1
TUBA1C		TKT
GINS2		DNAJB9
GPD1L		VAMP8
CUEDC1		TGFBR3
CYP27A1		SYTL4
TYMS		ATP5I
HNRNPA1		PROS1
IGSF1		KCNB1
OAF		CYC1
KIF12		SLC22A7
PBK		C16orf13
DDR1		IRF6
FAM213B		PPP1R3B
APOF		NT5C3B
CDK4		ADAMTSL3
TSPAN3		BRI3
C1orf106		GSDMD
RRAGD		DBH
MIS18A		HOXC9
ATP1A1		GSTA2
MMP1		TIGD2
MAPK12		KLHDC8B
ECT2		CPEB2
MID1IP1		HIPK2
RMI2		FBXL6
IQGAP3		CLDND2
SLC29A4		EIF3E
S100A14		COX7A2
TMEM106C		CYP39A1
ANKRD52		MAN1C1
ZNF320		STEAP3
LYPD1		CNDP1
ARHGAP11A		TSTA3
DDAH2		SIK2
CLEC2L		BCO2
VAT1		S100A16
WASF1		EFHD1
GRN		MRPL12
NREP		GPAA1
SLC25A47		ARHGEF26
WFS1		ABHD15
SSTR2		PNMA3
CLYBL		SCRIB
ZIC2		TSC22D3
TMEM246		AVPR1A
SLC51A		COMTD1
ITPKA		PYGL
EIF4EBP1		FBLL1
SFN		BLOC1S1
HP		DYDC2
ZYX		PID1
GPR160		FOXA3
GCGR		DEFB132
RNASE4		SEL1L
FOXM1		ATP6V1C1
CORO1C		CYP7B1
DTL		TMEM160
HMGB2		SLC39A8
AURKA		PAPSS2
IGSF3		NDUFA11
C12orf75		MT-ATP6
PPT2		MIF
SLC39A7		DPM3
CAD		PCCA
RTKN		KCNJ4
SNAP25		RRS1
ASPM		HCFC1R1
PGD		DUSP1
PEA15		SLC25A20
E2F1		C6orf1
SMPDL3B		ART4
ARG1		ADAMTSL4
DCAF16		GDF15
FAM222A		COX6C
POF1B		CENPV
CBX1		CYP2A13
OIP5		CITED4
E2F3		CPT1A
ECHS1		PET100
NAALADL1		AIFM2
CYB5D2		COL5A3
ZBTB12		TRPM8
CNPY3		GMDS
TTYH1		PYCRL
SLC18B1		MROH6
ACOT1		NME4
ACY3		ZFAND2A
STEAP4		TDO2
SPAG5		CCDC85B
WSB1		LAMP2
FUT2		HIST2H2AC
SLC7A10		CFH
IARS		FTL
SNRPN		BCAP31
NUSAP1		AP1M2
MND1		APRT
C3		SLC37A4
PRC1		TNNC1
LCAT		TALDO1
PC		TTPAL
MSRA		TMOD1
CHKA		MYO1A
CFHR3		NTN1
SLC50A1		INHA
RPL39L		C1R
PSPH		DUSP10
CCHCR1		GCK
FAH		OASL
TTC38		SPTBN2
FOLR1		MRPL55
LPA		CHRNA4
BEX2		NUDT2
HKDC1		SCAND1
HMGCL		UGT1A9
UNC119B		GREM2
TOR3A		TRIM16
ARNTL2		ADIPOR2
KCNJ11		MRPL24
CBX4		MT-ND1
TUFT1		SSUH2
ZNF496		TXN
TPD52		SLC7A2
LBR		CA2
HAVCR1		IL13RA1
CA5A		APOL6
KCND3		USP2
POPDC3		H6PD
CTSV		SYNGR1
ACSL3		SLC16A13
ABCD1		MVD
HSP90AB1		ARRDC4
LIX1L		NME1-NME2
RASSF3		DYSF
CCNA2		NAMPT
CFI		ST6GAL1
ELOVL7		FUCA1
SLC41A1		KDM8
SERPINI1		GADD45B
LRRC61		TP53INP2
GRB7		MT-ND2
CRYM		ZC3H3
UBE2Q2		UGT2B17
KCNH2		FCAMR
HES6		PRAMEF10
IGFBP4		MSMB
SLFN13		CUTA
ODC1		MT-CO3
DSN1		HOXC10
PCED1A		FKBP2
MAGED2		MLIP
MSH2		NPW
PM20D2		FAM198A
KIAA0907		C4B
PVRL1		RNF187
NECAB2		SLC4A4
SCAMP5		RGS14
MAPK8IP2		DDX60
TNIK		SLC2A10
DEGS1		EFNA1
CDCA7L		BCAM
RAMP1		COX4I1
GUCA2A		LRP5
TES		DHX58
MGST1		ERRFI1
CCDC28B		NCOA4
CDKN2A		NUDT12
ZNF761		PIK3C2G
CLDN4		SCUBE1
RAVER2		ADRA2C
PARP1		SPATA18
DMBT1		NDUFB7
ATP2B1		ISM1
CHD1L		CP
LEFTY1		SEC24D
CCNE1		GBE1
DHODH		FAM83H
PPARG		HEY2
ANXA13		ADCY1
PFN2		KANK1
CHAF1A		SEC11C
WDR72		SLC2A9
DONSON		GLI4
C6orf141		DDAH1
EIF5A2		AURKAIP1
CHML		ATP7B
BIN1		C19orf60
MEP1A		HMGN5
FUBP1		CYP2C18
MROH2A		CH507-42P11.8
IVNS1ABP		C4A
TMEM82		OLFM2
LHPP		KIAA1551
PLOD2		FBXO2
WBP5		DLK1
LDHA		MAFB
SYNE4		STYXL1
ERO1L		AHCY
GPX7		S100A1
MACROD1		ATP5D
MAFG		PPP1R16A
PCGF2		BCHE
SOBP		ANGPTL4
CLGN		NDUFA1
PRIM1		CYSTM1
CTSF		SPON2
SLC1A4		DGAT1
CYP11A1		BDH2
POC1A		GPX2
CHEK2		TMPRSS2
KLF5		TMEM25
S100A10		PRKAR1B
PNCK		DNPH1
MROH1		TMPRSS9
WDR76		NDUFA2
ZG16		FKBP5
OSGIN1		RAP2C
GADD45G		ENPP1
DFNA5		SOAT2
TMEM181		SLC40A1
PABPC1L		CBLN3
PDX1		TMEM27
DNMT1		PEPD
C15orf48		C1orf122
AP1G2		SLC22A10
HS6ST2		MRPL21
GPIHBP1		TRIP6
IPO5		EGFR
RAD51AP1		PLGLB2
CCDC64		MOCOS
MAGEF1		LAMTOR2
TCF19		GPR37
ESPL1		ADAMTS17
SERPINA11		SESN3
SLC9A3R1		CGREF1
LASP1		MAP3K5
YWHAQ		RBBP9
CTSE		CYP4X1
ATOH8		PACSIN3
PAK1		IDH1
HN1L		MBNL2
FTCD		SLC3A2
DYRK1B		PRODH
BOK		SLC38A2
TSPAN7		FKBP1B
ENAH		MCCD1
CCDC34		CISH
ALPL		SYT7
EPPK1		MT-CO2
ACOT4		PADI1
BTBD3		FAM195A
PRKDC		YBEY
PEG10		LINC00116
AKR1C3		MATN2
UPK3A		G0S2
LEAP2		CD99L2
MT1X		ETS2
GPC3		JUND
HMGN3		TMEM256
SAA4		C4orf19
ABHD11		ZNF358
ACTL6A		MTRNR2L12
SECTM1		ASB13
VIL1		AAMDC
CAPS		GJB2
WASF2		GDNF
SKP2		KISS1
ASS1		NPR3
SLC44A4		HSPA1B
PEMT		CREG1
TMCO3		MAMDC4
PQLC1		EEF1A1
UROC1		UGT3A1
ZNF28		PMVK
SPATS2L		H2AFJ
PRR15L		GIPC2
FLYWCH2		IGFALS
TGFBR3L		RNF128
PAQR8		TRIM2
TST		LPIN1
ERBB3		TMEM99
FGA		RNF208
MBL2		PRG4
PRDX1		C2orf82
PODXL2		NRBP2
NGFRAP1		PLCH2
CYCS		SIGIRR
MPPED1		OVGP1
ATAD2		TBX15
SPINK4		MRPL41
LRRC42		FAM13A
ABHD3		OPLAH
FAM83G		C5
ALDH4A1		NR4A2
ROBO1		PMM1
FOXQ1		TXNIP
ZSWIM5		TMEM86B
STK26		FNIP2
DSG2		PPP2R1B
ANP32E		GPR88
ZNF468		DACT2
ITGA5		AVPI1
KLHL23		PIGR
IER5		ASCL1
GSR		NIPAL2
PNP		ELOVL6
ANKRD10		APMAP
HSPH1		MT-ND3
RAD21		MFSD3
MOSPD1		TRAPPC6A
UTRN		ERO1LB
PEBP4		AGPAT9
PAQR4		PTP4A1
VWF		FGF21
PPP1R1B		LRRC75B
EPB41L2		ANKRD35
LRP11		C1orf21
ABHD14B		CD55
HMMR		C8orf82
CENPQ		HPS5
RTN2		AKR1B10
UGT1A10		PAIP2B
KBTBD11		SMPDL3A
ACADS		CTPS1
TBC1D16		HSPA1A
PRTFDC1		NAPRT
USP27X		PDLIM1
GNG7		SGCB
SYNJ2		ADSSL1
SUSD4		PLIN4
PPARD		CDKN1A
USP1		MYC
HPN		ZBTB33
C6orf223		MYO7A
BEX4		AKR1A1
TCEAL8		CPTP
QPCT		THOP1
ADD3		DPYD
RAPGEFL1		CCNB1IP1
RPSAP58		IDS
ACLY		ASAP3
PKN3		C7orf55
RRM1		THEM6
IRAK1		C6orf226
PLCXD1		GRAMD4
INCENP		MORC4
RAB15		PLS3
PLOD1		PARP10
MYCN		SHB
MTMR7		GRINA
CENPU		MAN1A1
PPM1H
DTD1
RBP7
CORO2A
IGFBP2
RBBP8
C1orf186
CHGA
CKAP2
IMPA2
EVPL
PLXNB1
CARHSP1
RAB11FIP4
NUCB2
CDKN2C
MAD2L2
MICB
FITM1
LLGL2
SGCE
GNAS
CFB
DECR1
CDK2
TMEM98
ATP8B2
EPS8L2
UGCG
ADAM15
ZBED6CL
CNKSR1
TSPYL2
GOLGA8B
TMEM194A
ZNF165
TPCN1
ZNF83
PAPSS1
IGFBP1
TMEM176B
MNS1
RAP2A
HOXA10
LGALS14
SLC29A2
ADPRHL1
IKBKAP
HSP90AA1
TFDP1
OCA2
FAHD2B
CTAG2
KDELC1
HNRNPH1
CDC42EP4
SNX7
ZNF266
LMO4
LRCOL1
MT1A
SLC6A9
TRIM55
RNASE2
GYLTL1B
MEST
TIMELESS
BTG3
PAQR7
GLMP
NUDT19
SLC25A22
SNX22
CCL28
GATA4
TIA1
ZSCAN18
KITLG
TRIM24
TMEM198
TUBB2B
SAA1
PTGDR2
SLC9A3R2
PLEKHG6
FGG
FBXO17
COL4A5
GLOD5
P4HA2
GLO1
SQLE
CFHR1
XPOT
ANXA9
APCS
SAA2
PCSK9
B3GNT5
TFRC
ANKRD65
TUBB2A
LPGAT1
PAQR9
IL17RB
SAA2-SAA4
RASSF4
FAM133A
HSD11B2
KCTD6
HGFAC
ENPP2
LIN28B
MAP4K4
ZNF331
TMEM14A
CTNNAL1
CD109
NRAS
VASN
GAGE2A
VDAC3
MICA
ZNF664
ORAOV1
UGT3A2
DECR2
EIF4EBP3
LRIG3
PHGDH
INPPL1
TMEM140
NRTN
CDKN2B
TMIE
H1FX
RFPL4B
SCGN
2024-03-09
SMARCA1
RNF157
MAGEH1
SYT1
FMO1
GLRB
FAM111B
C9
HMGN2
PAGE1
NEB
WEE1
FGB
SPTLC3
SAT1
GCA
NPFFR2
SRSF11
TMEM97
NECAB3
RILP
SSC4D
ALG1L
SLCO4C1
TAF7
COL27A1
FOXN4
PRMT6
RFC3
SNTA1
FZD6
PSIP1
PDIA2
DHFR
LENG8
TEX30
SMC4
TMPO
GTSF1
DEK
DAP
RRAS2
FADS1
PLEKHH3
TUBA3C
WDR6
FAM83D
TCF7L1
MEX3D
CDH2
SCARA3
KCNJ3
KIFC2
DSCR8
TP53I13
NTHL1
P4HTM
SLC25A5
COCH
MAGEA6
PBX3
STARD4
COX7B2
APOBEC3B
HPRT1
RGL3
GPR133
RFX5
ADAM23
LRG1
GPC5
PLXNC1
CAPN12
MAGEB2
TAF9B
SLC22A18
NINL
MAGEC2
MAEL
RTN4RL2
SSX2IP
GGT7
C8G
TMEM176A
ACADVL
DHCR7
CCNL2
FGL1
SSX1
PRPS2
HIST1H3B
FST
ZNF367
DDX39B
PTGFR
ASB9
NHSL1
MLLT11
RAI14
AGPAT5
MAP3K14
MAGEC1
SLC44A5
C1QL1
FADS2
GPX3
